# Supplementary material
Source: PubMed Central journal article supplement (PMC5562354)
Supplement: NIHMS877469-supplement-supp__3.pdf [file NIHMS877469-supplement-supp__3.pdf]

A

## Local densities of KCNQ1

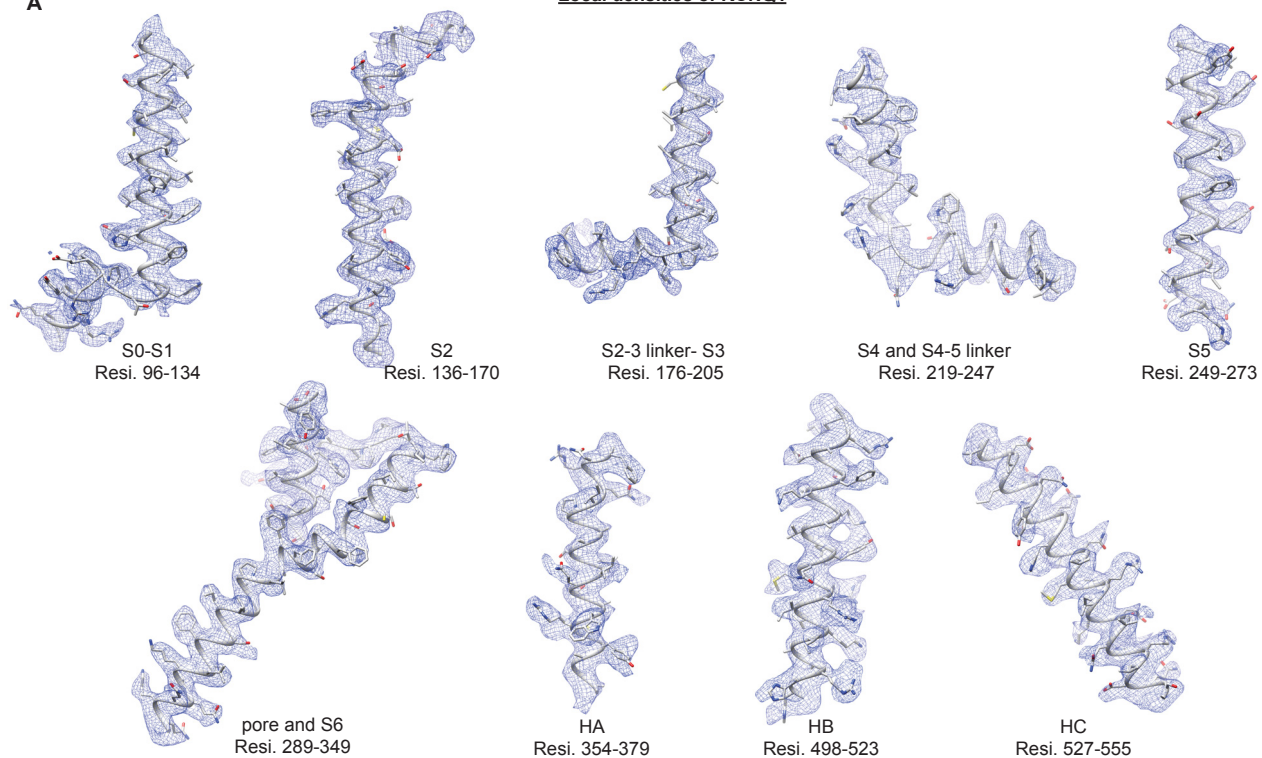

B

## Local densities of CaM

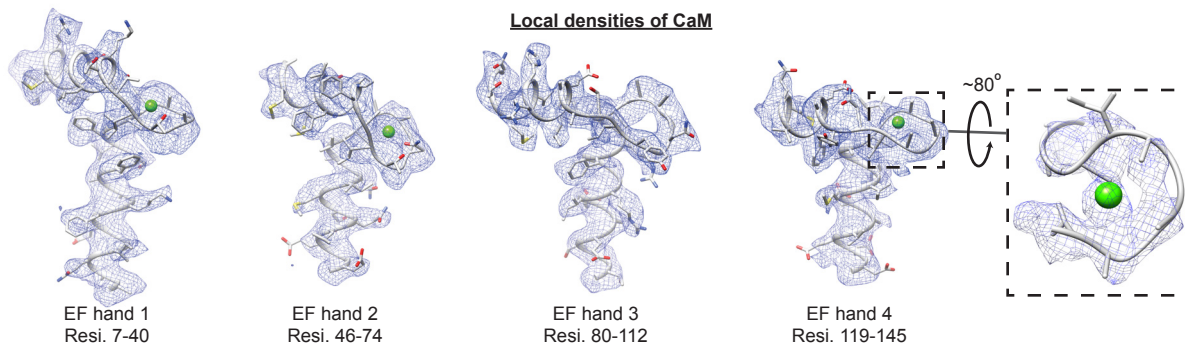

C

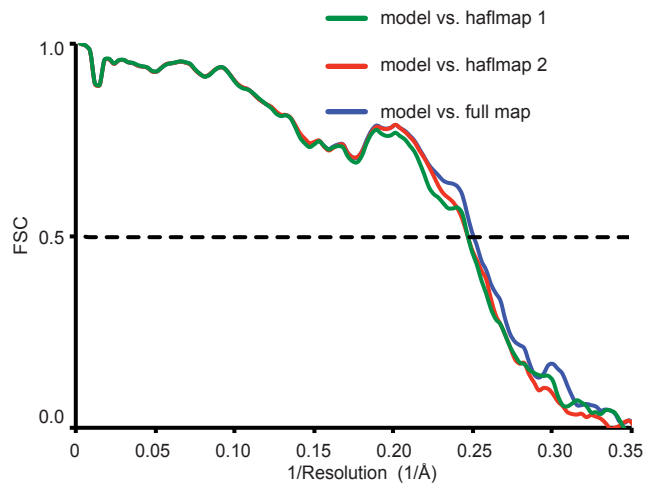

D

Table 1: Structure refinement and validation

| Refinement (Refmac)      |                                                          |
|--------------------------|----------------------------------------------------------|
| Space group              | P4                                                       |
| Cell dimension           | a=b=105.1 Å, c=122.3 Å<br>$\alpha=\beta=\gamma=90^\circ$ |
| Resolution limit         | 3.74 Å                                                   |
| Mean B-factor            | -203.1                                                   |
| Rms deviations           |                                                          |
| Bond length (Å)          | 0.0077                                                   |
| Bond angles ( $^\circ$ ) | 1.23                                                     |
| Ramachandran plot        |                                                          |
| Favored (%)              | 96.85                                                    |
| Allowed (%)              | 3.15                                                     |
| Outlier (%)              | 0.0                                                      |
| Molprobability score     |                                                          |
| Clash score              | 6.65                                                     |
| Favored rotamers (%)     | 98.62                                                    |
| Poor rotamers (%)        | 0.0                                                      |
| Molprobability score     | 1.56                                                     |
